# Supplementary material for: Measurement report: Abundance and fractional solubilities of aerosol metals in urban Hong Kong – insights into factors that control aerosol metal dissolution in an urban site in South China
Source: Copernicus journal article supplement (doi:10.5194/acp-23-1403-2023), 2023-01-25
Supplement: Supplementary file 1 [file acp-23-1403-2023-supplement.pdf]

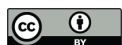

*Supplement of*

**Measurement report: Abundance and fractional solubilities of aerosol metals in urban Hong Kong – insights into factors that control aerosol metal dissolution in an urban site in South China**

**Junwei Yang et al.**

*Correspondence to:* Theodora Nah ([theodora.nah@cityu.edu.hk](mailto:theodora.nah@cityu.edu.hk))

The copyright of individual parts of the supplement might differ from the article licence.

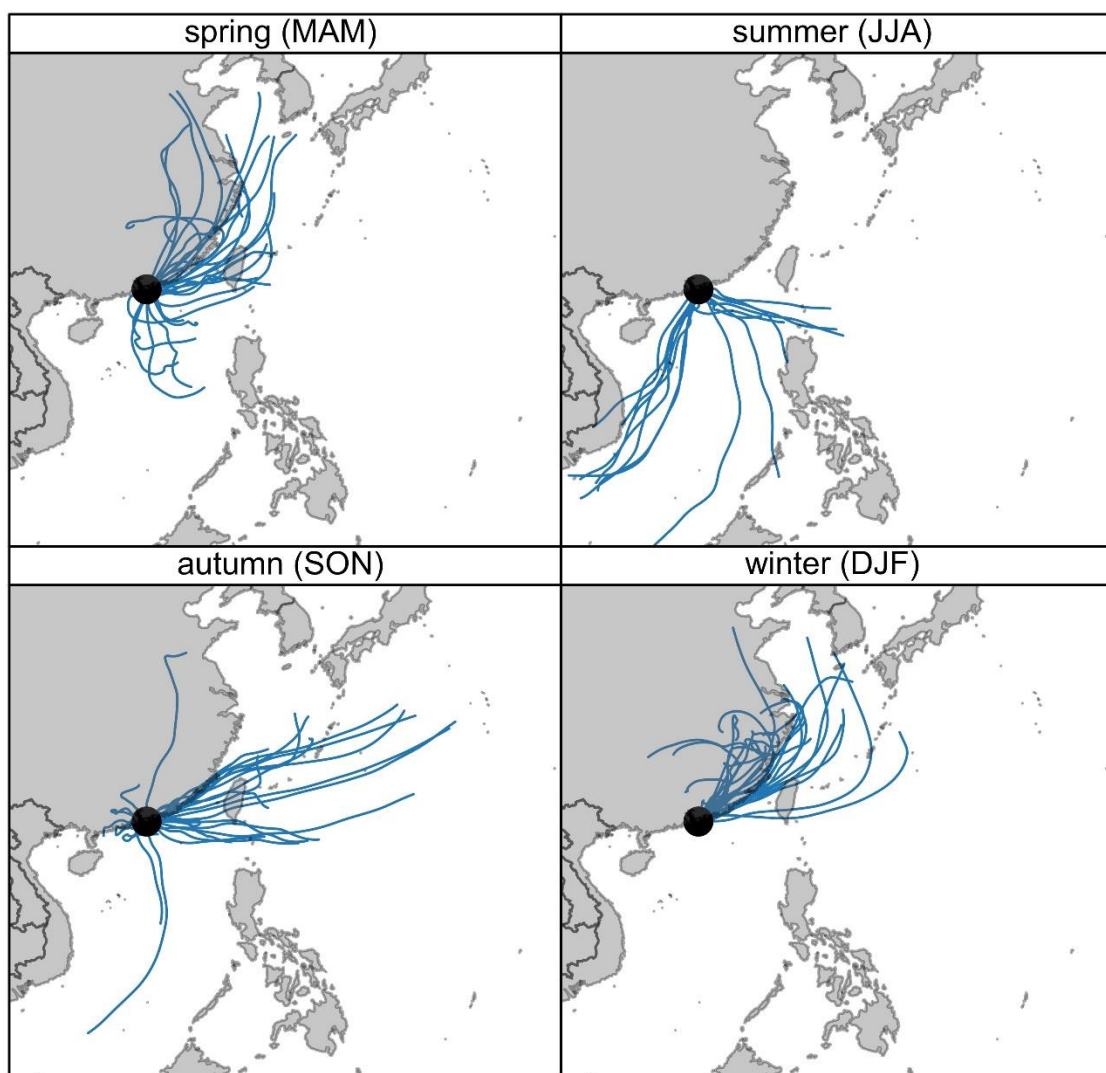

**Figure S1:** Back trajectories of air masses reaching Hong Kong (latitude = 22.303, longitude = 114.177, height = 100 m, duration = 72 h) during the four sampling periods. Back-trajectories calculations were performed by the Hybrid Split-Particle Lagrangian Integrated Trajectory (HYSPLIT) model using meteorological data from NCEP/NCAR Reanalysis (2.5° latitude-longitude grid).

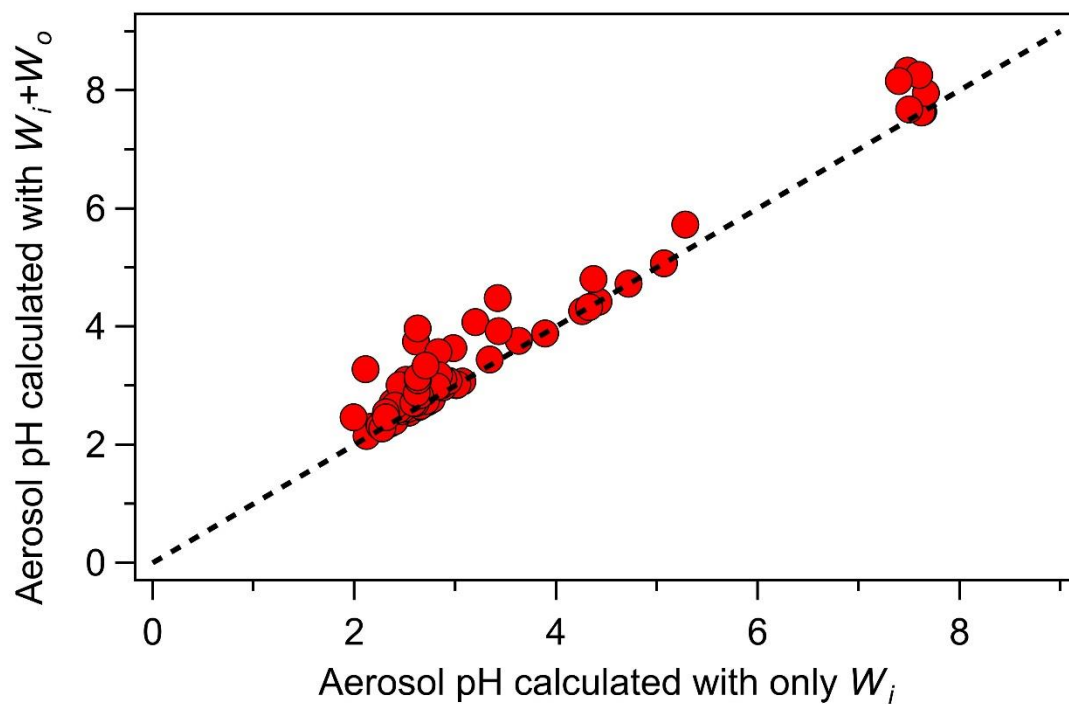

**Figure S2:** Comparisons of aerosol pH values calculated with (y axis) vs. without (x axis) contributions from  $W_o$ . The dashed line is the 1:1 line. Majority of the predicted pH values lie close to the dashed line. This indicated that the inclusion/exclusion of  $W_o$  into calculations did not impact aerosol pH significantly.

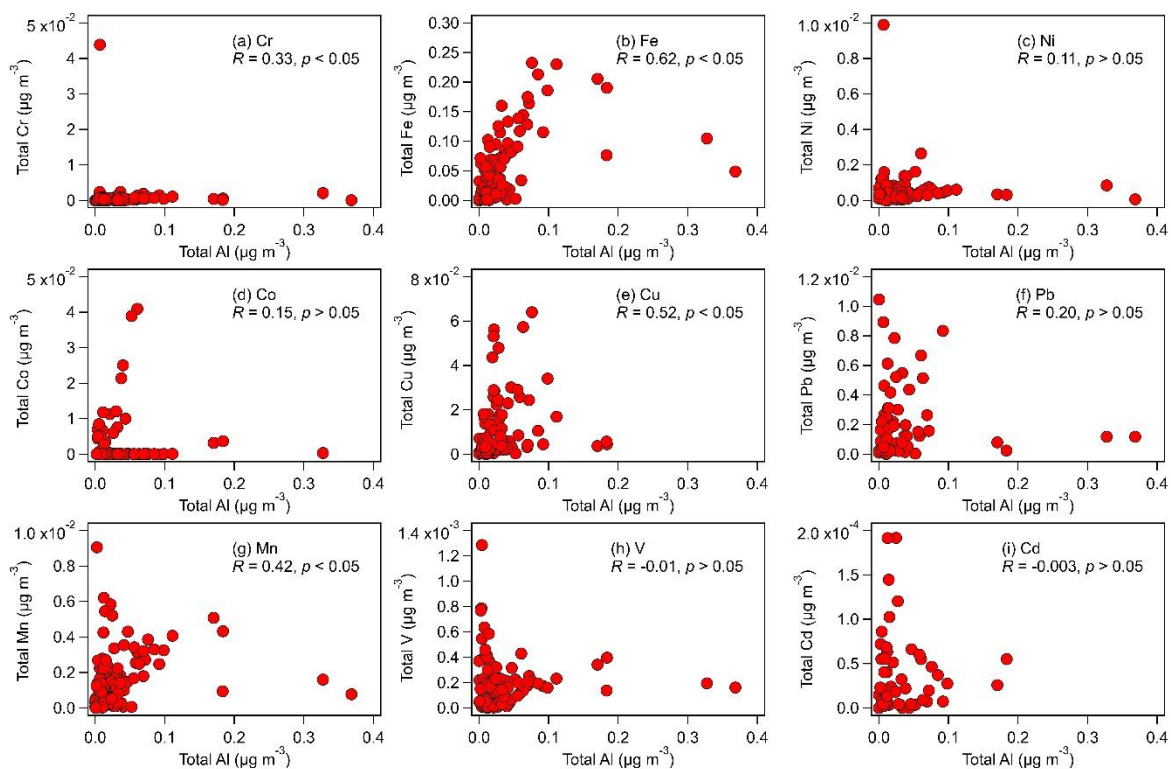

**Figure S3:** Relationships between the mass concentrations of total Al and the other total metals in coarse and fine aerosols. Only data with non-zero total metal concentrations were used in the figures. Also shown are the spearman correlation coefficients for each relationship.

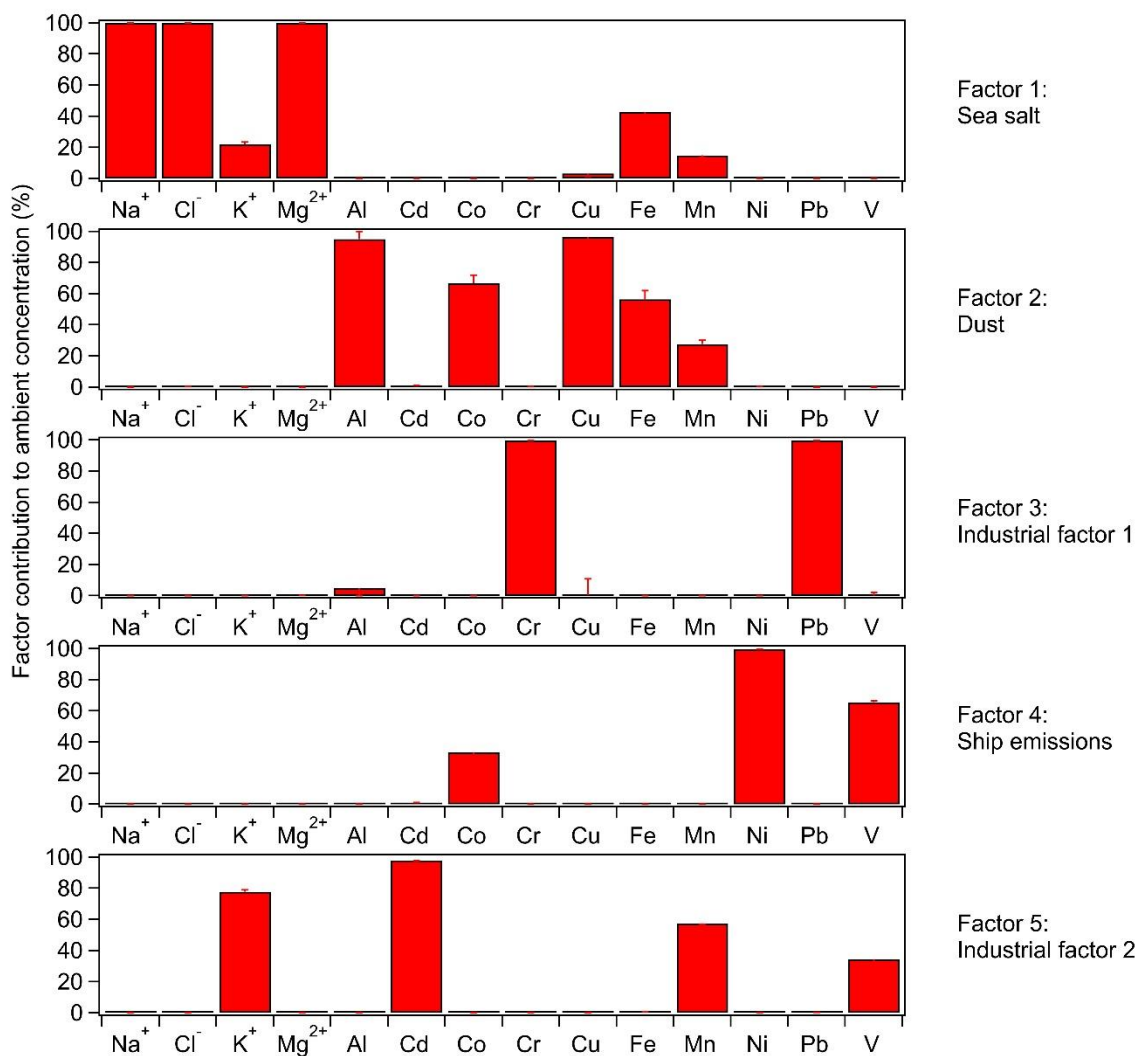

**Figure S4:** Profiles of the five factors resolved by positive matrix factorization (PMF) using bootstrap (BS) analysis for source apportionment of aerosols measured at the monitoring site. The error bars represent the largest displacement (DISP) uncertainty range from the base run.

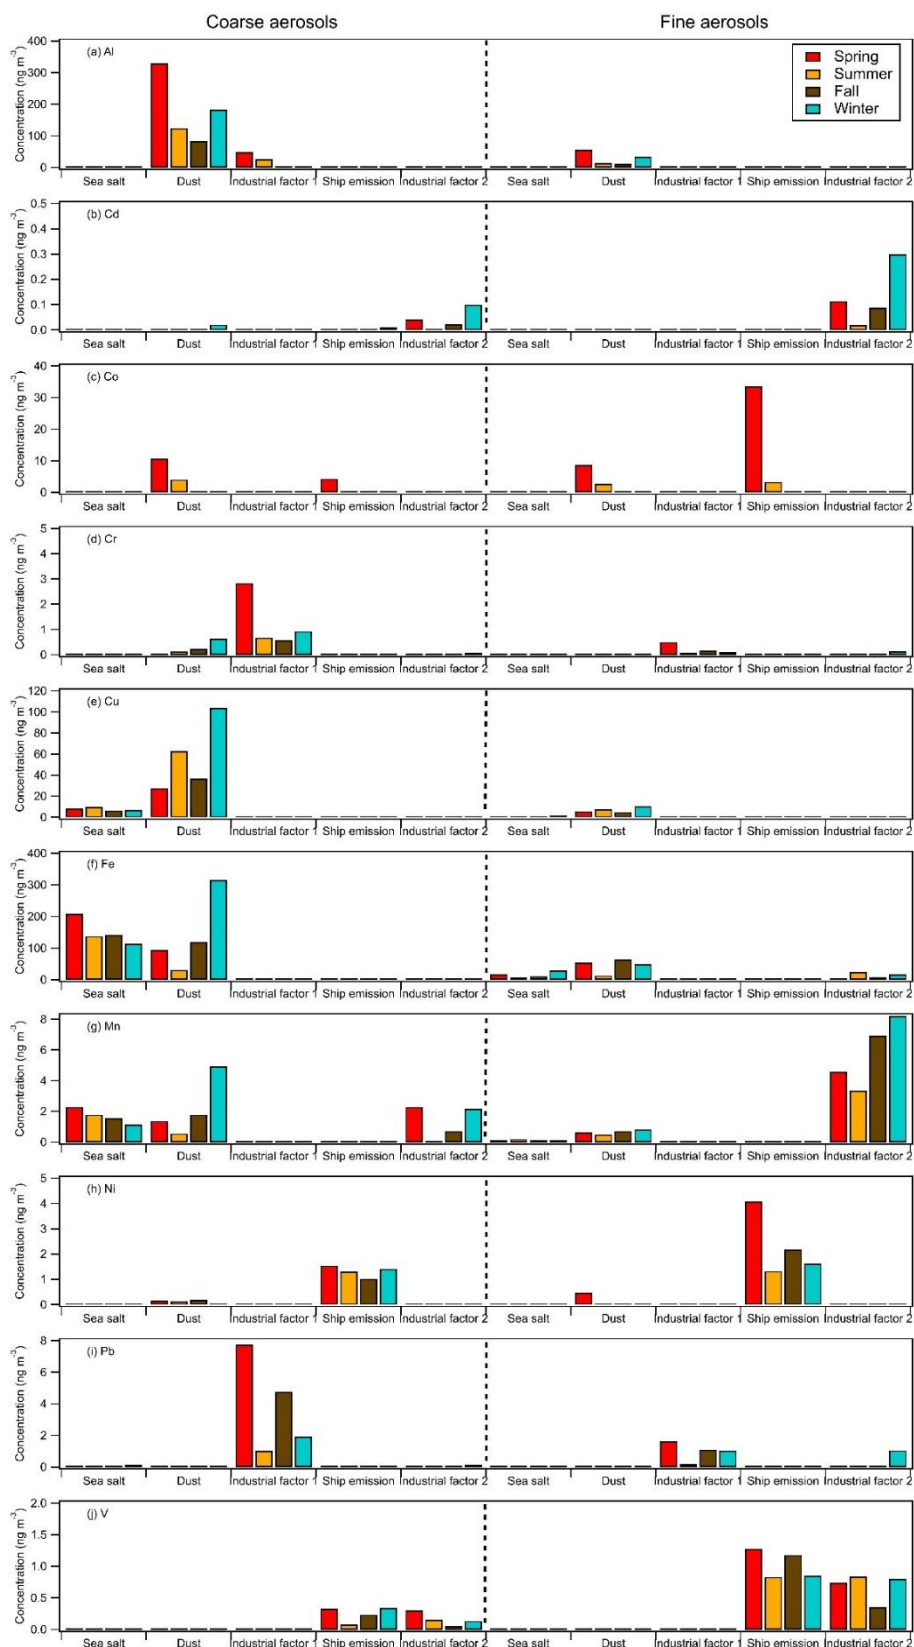

36

37 **Figure S5:** Seasonal mass contributions of each source to each species in coarse and fine  
 38 aerosols.

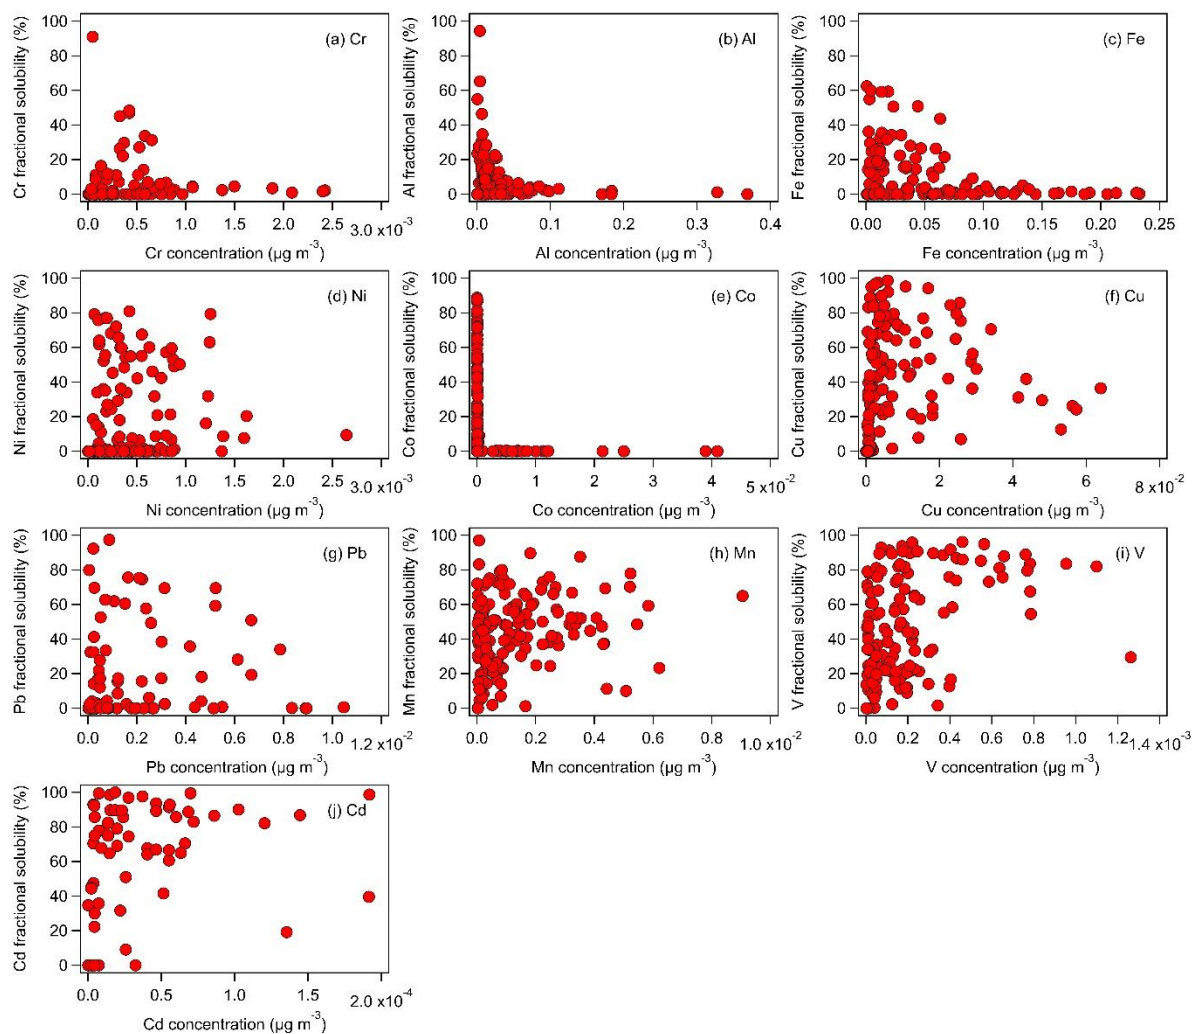

**Figure S6:** Metal fractional solubility vs. total metal concentration for fine and coarse aerosols. The fractional solubility values were calculated by dividing the water-soluble metal mass concentration by the total metal mass concentration. Only data with non-zero total metal concentrations were used in the figures.

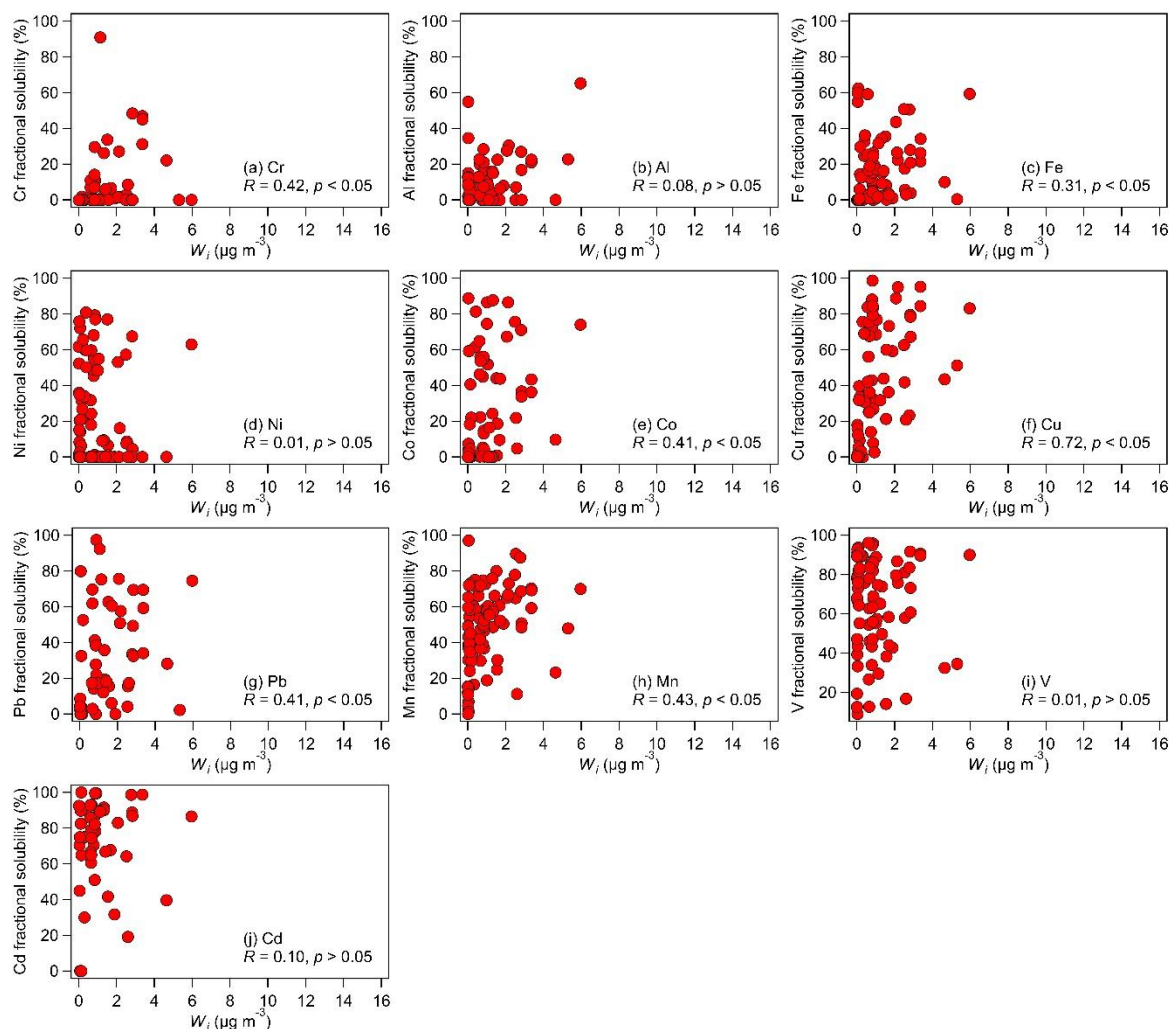

**Figure S7:** Relationships between the metal fractional solubilities and  $W_i$  in fine aerosols. Only data with non-zero total metal concentrations were used in the figures. Also shown are the spearman correlation coefficients for each relationship.



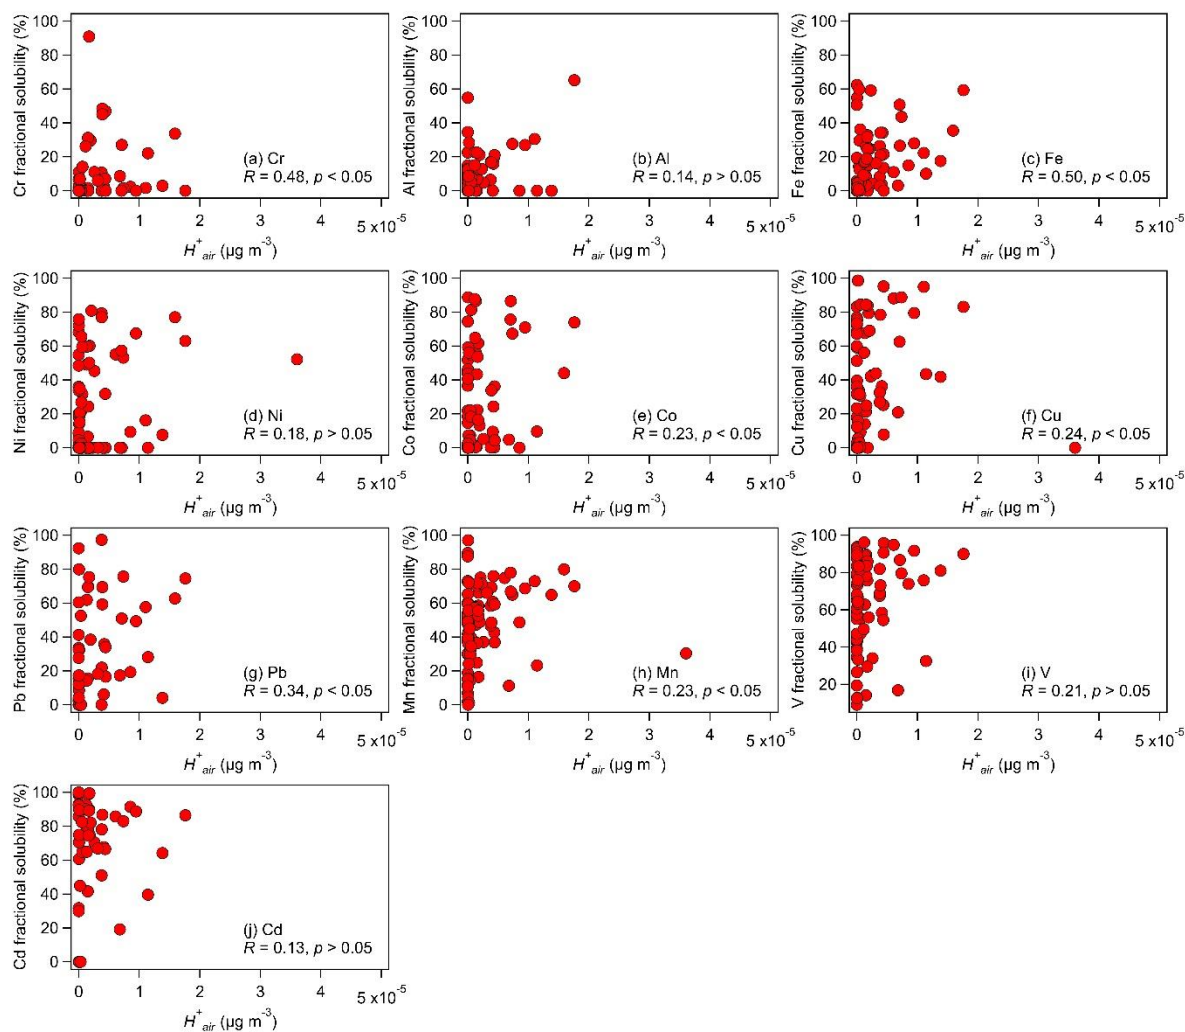

**Figure S8:** Relationships between the metal fractional solubilities and  $H_{air}^+$  in fine aerosols. Only data with non-zero total metal concentrations were used in the figures. Also shown are the spearman correlation coefficients for each relationship.

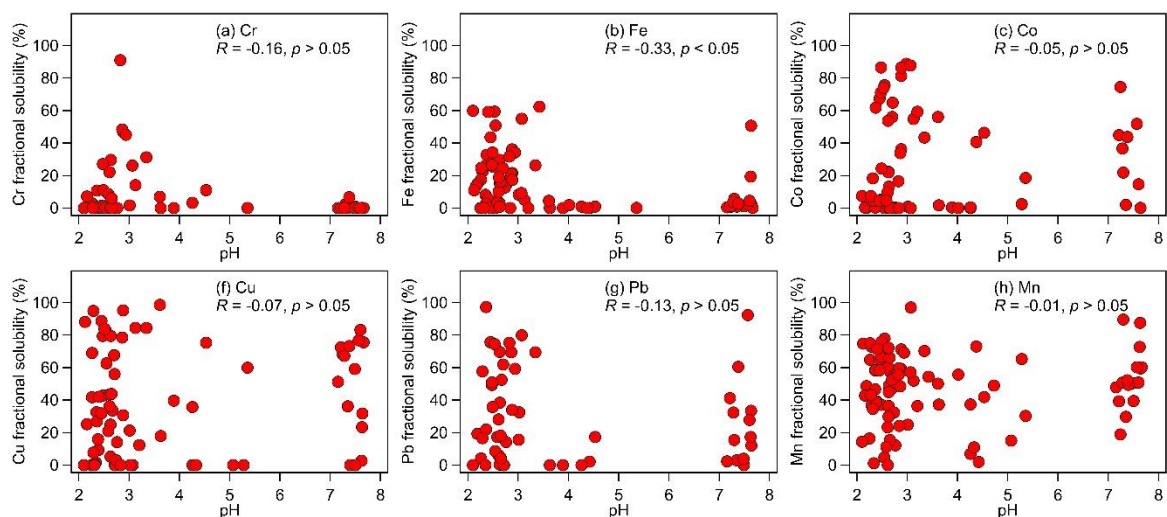

**Figure S9:** Relationships between the Cr, Fe, Co, Cu, Pb, and Mn fractional solubilities and fine aerosol pH. Only data with non-zero total metal concentrations were used in the figures. Also shown are the spearman correlation coefficients for each relationship. Only the correlation between the Fe fractional solubility and fine aerosol pH was statistically significant.

**Table S1:** Comparison of average total metal concentrations ( $\text{ng m}^{-3}$ ) in 2012/2013 by Jiang et al. (2015) and 2021/2022 (this study) at a Kowloon Tong in Hong Kong

(a) Comparison of winter mass concentrations

| Metal | Jiang et al. (2015) <sup>a</sup> |                     | This study <sup>b</sup> |                     |
|-------|----------------------------------|---------------------|-------------------------|---------------------|
|       | Fine                             | Coarse <sup>c</sup> | Fine                    | Coarse <sup>c</sup> |
| Cr    | 3                                | 2.7                 | 1.11                    | 0.94                |
| Al    | 254                              | 301.2               | 78.53                   | 135.12              |
| Fe    | 137                              | 142                 | 204.71                  | 301.22              |
| Ni    | 4.4                              | 1.6                 | 1.97                    | 0.84                |
| Cu    | 19.7                             | 4                   | 20.61                   | 61.20               |
| Pb    | 49.4                             | 2.9                 | 8.98                    | 0.86                |
| Mn    | 17.1                             | 5.2                 | 11.82                   | 5.18                |
| V     | 9.2                              | 0.9                 | 1.41                    | 0.30                |
| Cd    | 1.1                              | 0.1                 | 0.22                    | 0.03                |

<sup>a</sup> Measurements were performed from 12 November 2012 to 10 December 2012.

<sup>b</sup> Measurements were performed from 15 December 2021 to 26 January 2022.

<sup>c</sup> Mass concentrations measured for the MOUDI impactor stage 11 ( $18 \mu\text{m}$  nominal cutoff) was excluded in this comparison since Jiang et al. (2015) reported mass concentrations for  $\text{PM}_{2.5-10}$  for their coarse aerosol measurements.

(b) Comparison of spring/summer mass concentrations

| Metal | Jiang et al. (2015) <sup>a</sup> |                     | This study <sup>b</sup> |                     |
|-------|----------------------------------|---------------------|-------------------------|---------------------|
|       | Fine                             | Coarse <sup>c</sup> | Fine                    | Coarse <sup>c</sup> |
| Cr    | 7.2                              | 1.5                 | 2.53                    | 1.24                |
| Al    | 591                              | 528.9               | 107.14                  | 237.76              |
| Fe    | 190.6                            | 153                 | 150.33                  | 163.59              |
| Ni    | 10                               | 1.3                 | 3.84                    | 0.94                |
| Cu    | 21.6                             | 5.5                 | 11.98                   | 24.16               |
| Pb    | 52.7                             | 2.8                 | 6.92                    | 3.69                |
| Mn    | 19.3                             | 5                   | 6.45                    | 2.87                |
| V     | 25.6                             | 1.8                 | 1.90                    | 0.31                |
| Cd    | 1.2                              | 0.1                 | 0.08                    | 0.01                |

<sup>a</sup> Measurements were performed from 8 April 2013 to 13 May 2013.

<sup>b</sup> Measurements were performed from 7 March 2021 to 4 April 2021, 23 to 30 June 2021, and 7 to 14 July 2021.

<sup>c</sup> Mass concentrations measured for the MOUDI impactor stage 11 ( $18 \mu\text{m}$  nominal cutoff) was excluded in this comparison since Jiang et al. (2015) reported mass concentrations for  $\text{PM}_{2.5-10}$  for their coarse aerosol measurements.

**Table S2:** Spearman rank correlations between the water-soluble and total metals in fine and coarse aerosols<sup>a</sup>

| Metal | Fine        | Coarse      |
|-------|-------------|-------------|
| Cr    | <b>0.49</b> | <b>0.50</b> |
| Al    | <b>0.40</b> | 0.14        |
| Fe    | <b>0.58</b> | <b>0.48</b> |
| Ni    | <b>0.43</b> | <b>0.30</b> |
| Co    | 0.16        | 0.06        |
| Cu    | <b>0.86</b> | <b>0.81</b> |
| Pb    | <b>0.60</b> | <b>0.43</b> |
| Mn    | <b>0.93</b> | <b>0.95</b> |
| V     | <b>0.89</b> | <b>0.81</b> |
| Cd    | <b>0.96</b> | <b>0.64</b> |

<sup>a</sup> Bold: statistically significant ( $p < 0.05$ )

**Table S3:** Spearman rank correlations between the metal fractional solubilities and nitrate and aerosol properties<sup>a</sup>

| Metal | Nitrate      | Ammonium    | RH           | Temp         |
|-------|--------------|-------------|--------------|--------------|
| Cr    | <b>0.67</b>  | <b>0.51</b> | <b>-0.53</b> | <b>-0.78</b> |
| Al    | -0.05        | 0.09        | -0.07        | -0.09        |
| Fe    | -0.04        | <b>0.39</b> | 0.01         | 0.06         |
| Ni    | <b>-0.26</b> | -0.05       | <b>0.25</b>  | <b>0.77</b>  |
| Co    | 0.16         | <b>0.33</b> | -0.01        | 0.02         |
| Cu    | <b>0.67</b>  | <b>0.59</b> | 0.00         | 0.00         |
| Pb    | <b>0.34</b>  | <b>0.38</b> | -0.25        | -0.12        |
| Mn    | 0.14         | <b>0.22</b> | 0.02         | -0.11        |
| V     | <b>-0.29</b> | <b>0.23</b> | 0.18         | 0.10         |
| Cd    | -0.16        | 0.11        | 0.08         | -0.17        |

<sup>a</sup> Bold: statistically significant ( $p < 0.05$ )

## Section S1. Source apportionment

To identify the major sources of the measured total aerosol metals, source apportionment was performed with positive matrix factorization (PMF) using EPA PMF 5.0 software. PMF decomposes the measured concentration matrix ( $x_{ij}$ ) into two matrices: the factor contributions matrix ( $g_{ik}$ ) and factor profiles ( $f_{kj}$ ) plus a residue matrix ( $e_{ij}$ ) (Paatero and Tapper, 1994; Paatero, 1997):

$$x_{ij} = \sum_{k=1}^p g_{ik} f_{kj} + e_{ij} \dots \quad (1)$$

where  $p$  is the number of factors determined by the user. Factor contributions and profiles are determined by minimizing the objective function ( $Q$ ):

$$Q = \sum_{i=1}^n \sum_{j=1}^m \left[ \frac{x_{ij} - \sum_{k=1}^p g_{ik} f_{kj}}{u_{ij}} \right]^2 \dots \quad (2)$$

where  $u_{ij}$  is the uncertainty matrix provide by the user. The ultimate goal is to achieve chemical mass balance between the measured species and source contributions by minimizing  $Q$ . Two error estimation approaches were used to analyze the model-resolved factor profiles: Bootstrap (BS) and Displacement (DISP) (Paatero et al., 2014). The EPA PMF 5.0 software conducts BS by randomly perturbing the original data set and generating new PMF results using the resampled version of input data. The BS factor is subsequently assigned to the base run factor with which the BS factor has the highest correlation, above a user-defined threshold. BS estimation involves uncertainties derived from random errors and partially from rotational ambiguity. The EPA PMF 5.0 software performs DISP by “displacing” each variable in the well-fitted factor  $f_{kj}$  far enough such that  $Q$  increases by a pre-defined maximum value  $dQ^{max}$ . Such extensions estimate the upper and lower intervals of each species in the factor profile. By nature, DISP reflects the uncertainty derived from rotational ambiguity.

The mass concentrations of 14 chemical species ( $\text{Na}^+$ ,  $\text{Cl}^-$ ,  $\text{K}^+$ ,  $\text{Mg}^{2+}$ ,  $^{27}\text{Al}$ ,  $^{51}\text{V}$ ,  $^{52}\text{Cr}$ ,  $^{55}\text{Mn}$ ,  $^{57}\text{Fe}$ ,  $^{59}\text{Co}$ ,  $^{60}\text{Ni}$ ,  $^{65}\text{Cu}$ ,  $^{111}\text{Cd}$ , and  $^{208}\text{Pb}$ ) measured on each MOUDI stage during every sampling period (total of 175 sets of samples) were used as the input matrix. 100 BS runs were performed. Uncertainties were as following:

$$u_{ij} = \sqrt{(x_{ij} \times EF)^2 + (MDL)^2} \dots \quad (3)$$

where  $x_{ij}$  is the measured concentration, EF is the user-defined error fraction for individual species derived from the experimental data, and MDL is the method detection limit. For concentrations below MDL, the uncertainty was set to  $5/6 \times MDL$ . In PMF, the optimal number of factors is a compromise between resolving factors with the best physical meanings and a good fit for all input species. 3 to 7 factors were tested, and the final number was determined by examining the changes in  $Q_{robust}/Q_{exp}$  and the physical interpretation of each factor.  $Q_{exp} \approx nm - p(n + m)$ , denotes the degree of freedom of the model solution, where n, m, and p refer to the number of samples, the number of species input into PMF, and the number of factors. Based on the minimal Q values and the physical interpretations of the resolved factor, the five-factor solution was selected. These five factors were broadly classified as: Sea salt, Dust, Industrial, Residual oil, and Ship emissions. The  $Q_{robust}/Q_{exp}$  changed 14.8% from a four-factor to a five-factor solution, while the  $Q_{robust}/Q_{exp}$  changed 22.6% from a three-factor solution to a four-factor solution.

Figure S3 shows the factor profiles resolved in the five-factor solution. Source identification was based on the tracer species with the highest mass loadings. The first factor was marked by the high loadings of common sea salt tracers  $Na^+$ ,  $Cl^-$ , and  $Mg^{2+}$ , thus it was identified as “sea salt” (Chow et al., 2022). Interestingly, the “sea salt” factor had a noticeably high Fe loading. Previous studies have reported Fe deposition to marine waters from continental outflows of mineral dust, biomass burning aerosols, and oil fly ash (Ito, 2013; Wang et al., 2015; Matsui et al., 2018). This could result in substantial concentrations of Fe in sea salt, which in turn would lead to the high loading of Fe in the “sea salt” factor. The second factor was identified as “dust” due to its high loadings of Al, Fe, and Mn, which are known mineral dust tracers (Chow et al., 2022). Cu is also a dominant species in this second factor. Previous studies have attributed Cu to brake/tire wear, and Fe and Mn to both dust and brake/tire wear (Garg et al., 2000; Adachi and Tainosho, 2004; Lough et al., 2005). Thus, resuspended road dust containing brake/tire wear particles could have contributed to this “dust” factor. Interestingly, the “dust” factor had a noticeably high Co loading. This could be explained by Co being widely found in rocks, soil, water, and plants. It is the 33<sup>rd</sup> abundant element in

the Earth's crust with an average concentration of 20 µg/g (Lison, 1996). While Co can also be emitted from anthropogenic sources such as coal-fired power generation, vehicle exhaust, and mining activities (Wu et al., 2022; Johansson et al., 2009), these sources were not resolved in this work since we did not measure their source-specific tracers. The fourth factor was identified as "ship emissions" since it was marked by high loadings of Ni and V, which are known tracers for ship emissions (Chow et al., 2022). The third and fifth factors were broadly classified as "industrial factor 1" and "industrial factor 2" since their dominant metal species are typically associated with industrial emissions (Chow et al., 2022).

## Section S2. Aerosol liquid water concentration associated with organics

The following equation was used to calculate the aerosol liquid water concentration (µg m<sup>-3</sup>) associated with organic species (Guo et al., 2015):

$$W_o = \frac{m_{org}\rho_w}{\rho_{org}} \frac{\kappa_{org}}{(\frac{1}{RH}-1)} \quad (4)$$

where  $m_{org}$  is the organic mass concentration (µg m<sup>-3</sup>),  $\rho_w$  is the water density (1 µg m<sup>-3</sup>),  $\rho_{org}$  is the organic density,  $\kappa_{org}$  is the organic hygroscopicity parameter, and RH is the relative humidity of the sampling period. We calculated  $m_{org}$  by multiplying the measured water-soluble organic carbon (WSOC) concentration by 1.6, which is the conversion factor recommended for converting WSOC to organic mass in urban aerosols (Turpin and Lim, 2001). We assumed  $\rho_{org}$  to be 1.4 g cm<sup>-3</sup>, which is the value usually assumed for the density of ambient organic aerosols in previous studies (Guo et al., 2015; Shiraiwa et al., 2017; Kuwata et al., 2012; King et al., 2007). We used 0.35 for  $\kappa_{org}$ , which is the average of the range of values (0.28 to 0.39) previously measured for organic aerosols in Hong Kong (Meng et al., 2014).

## References

Adachi, K. and Tainosho, Y.: Characterization of heavy metal particles embedded in tire dust,



205 Environment International, 30, 1009-1017, <https://doi.org/10.1016/j.envint.2004.04.004>, 2004.

206 Chow, W. S., Huang, X. H. H., Leung, K. F., Huang, L., Wu, X., and Yu, J. Z.: Molecular and  
 207 elemental marker-based source apportionment of fine particulate matter at six sites in Hong  
 208 Kong, China, Science of The Total Environment, 813, 152652,  
 209 <https://doi.org/10.1016/j.scitotenv.2021.152652>, 2022.

210 Garg, B. D., Cadle, S. H., Mulawa, P. A., Groblicki, P. J., Laroo, C., and Parr, G. A.: Brake  
 211 Wear Particulate Matter Emissions, Environmental Science & Technology, 34, 4463-4469,  
 212 10.1021/es001108h, 2000.

213 Guo, H., Xu, L., Bougiatioti, A., Cerully, K. M., Capps, S. L., Hite Jr, J. R., Carlton, A. G., Lee,  
 214 S. H., Bergin, M. H., Ng, N. L., Nenes, A., and Weber, R. J.: Fine-particle water and pH in the  
 215 southeastern United States, Atmos. Chem. Phys., 15, 5211-5228, 10.5194/acp-15-5211-2015,  
 216 2015.

217 Ito, A.: Global modeling study of potentially bioavailable iron input from shipboard aerosol  
 218 sources to the ocean, Global Biogeochemical Cycles, 27, 1-10,  
 219 <https://doi.org/10.1029/2012GB004378>, 2013.

220 Jiang, S. Y., Kaul, D. S., Yang, F., Sun, L., and Ning, Z.: Source apportionment and water  
 221 solubility of metals in size segregated particles in urban environments, Science of The Total  
 222 Environment, 533, 347-355, <https://doi.org/10.1016/j.scitotenv.2015.06.146>, 2015.

223 Johansson, C., Norman, M., and Burman, L.: Road traffic emission factors for heavy metals,  
 224 Atmospheric Environment, 43, 4681-4688, <https://doi.org/10.1016/j.atmosenv.2008.10.024>,  
 225 2009.

226 King, S. M., Rosenoern, T., Shilling, J. E., Chen, Q., and Martin, S. T.: Cloud condensation  
 227 nucleus activity of secondary organic aerosol particles mixed with sulfate, Geophysical  
 228 Research Letters, 34, <https://doi.org/10.1029/2007GL030390>, 2007.

229 Kuwata, M., Zorn, S. R., and Martin, S. T.: Using elemental ratios to predict the density of  
 230 organic material composed of carbon, hydrogen, and oxygen, Environ Sci Technol, 46, 787-  
 231 794, <https://doi.org/10.1021/es202525q>, 2012.

232 Lison, D.: Human Toxicity of Cobalt-Containing Dust and Experimental Studies on the  
 233 Mechanism of Interstitial Lung Disease (Hard Metal Disease), Critical Reviews in Toxicology,  
 234 26, 585-616, 10.3109/10408449609037478, 1996.

235 Lough, G. C., Schauer, J. J., Park, J.-S., Shafer, M. M., DeMinter, J. T., and Weinstein, J. P.:  
 236 Emissions of Metals Associated with Motor Vehicle Roadways, Environmental Science &  
 237 Technology, 39, 826-836, 10.1021/es048715f, 2005.

238 Matsui, H., Mahowald, N. M., Moteki, N., Hamilton, D. S., Ohata, S., Yoshida, A., Koike, M.,  
 239 Scanza, R. A., and Flanner, M. G.: Anthropogenic combustion iron as a complex climate forcer,  
 240 Nature Communications, 9, 1593, 10.1038/s41467-018-03997-0, 2018.

- Meng, J. W., Yeung, M. C., Li, Y. J., Lee, B. Y. L., and Chan, C. K.: Size-resolved cloud condensation nuclei (CCN) activity and closure analysis at the HKUST Supersite in Hong Kong, *Atmos. Chem. Phys.*, 14, 10267-10282, 10.5194/acp-14-10267-2014, 2014.
- Paatero, P.: Least squares formulation of robust non-negative factor analysis, *Chemometrics and Intelligent Laboratory Systems*, 37, 23-35, [https://doi.org/10.1016/S0169-7439\(96\)00044-5](https://doi.org/10.1016/S0169-7439(96)00044-5), 1997.
- Paatero, P. and Tapper, U.: Positive matrix factorization: A non-negative factor model with optimal utilization of error estimates of data values, *Environmetrics*, 5, 111-126, <https://doi.org/10.1002/env.3170050203>, 1994.
- Paatero, P., Eberly, S., Brown, S. G., and Norris, G. A.: Methods for estimating uncertainty in factor analytic solutions, *Atmos Meas Tech*, 7, 781-797, 10.5194/amt-7-781-2014, 2014.
- Shiraiwa, M., Li, Y., Tsimpidi, A. P., Karydis, V. A., Berkemeier, T., Pandis, S. N., Lelieveld, J., Koop, T., and Pöschl, U.: Global distribution of particle phase state in atmospheric secondary organic aerosols, *Nature Communications*, 8, 15002, <https://doi.org/10.1038/ncomms15002>, 2017.
- Turpin, B. J. and Lim, H.-J.: Species Contributions to PM<sub>2.5</sub> Mass Concentrations: Revisiting Common Assumptions for Estimating Organic Mass, *Aerosol Science and Technology*, 35, 602-610, <https://doi.org/10.1080/02786820119445>, 2001.
- Wang, R., Balkanski, Y., Boucher, O., Bopp, L., Chappell, A., Ciais, P., Hauglustaine, D., Peñuelas, J., and Tao, S.: Sources, transport and deposition of iron in the global atmosphere, *Atmos. Chem. Phys.*, 15, 6247-6270, 10.5194/acp-15-6247-2015, 2015.
- Wu, Y., Liu, Q., Ma, J., Zhao, W., Chen, H., and Qu, Y.: Antimony, beryllium, cobalt, and vanadium in urban park soils in Beijing: Machine learning-based source identification and health risk-based soil environmental criteria, *Environmental Pollution*, 293, 118554, <https://doi.org/10.1016/j.envpol.2021.118554>, 2022.
